# Supplementary material for: High expression of TARS is associated with poor prognosis of endometrial cancer
Source: publisher site journal article supplement (doi:10.18632/aging.204558), 2023-03-06
Supplement: Supplementary file [file aging-v15i5-204558-supplementary-material-SD1.pdf]

## SUPPLEMENTARY FIGURE

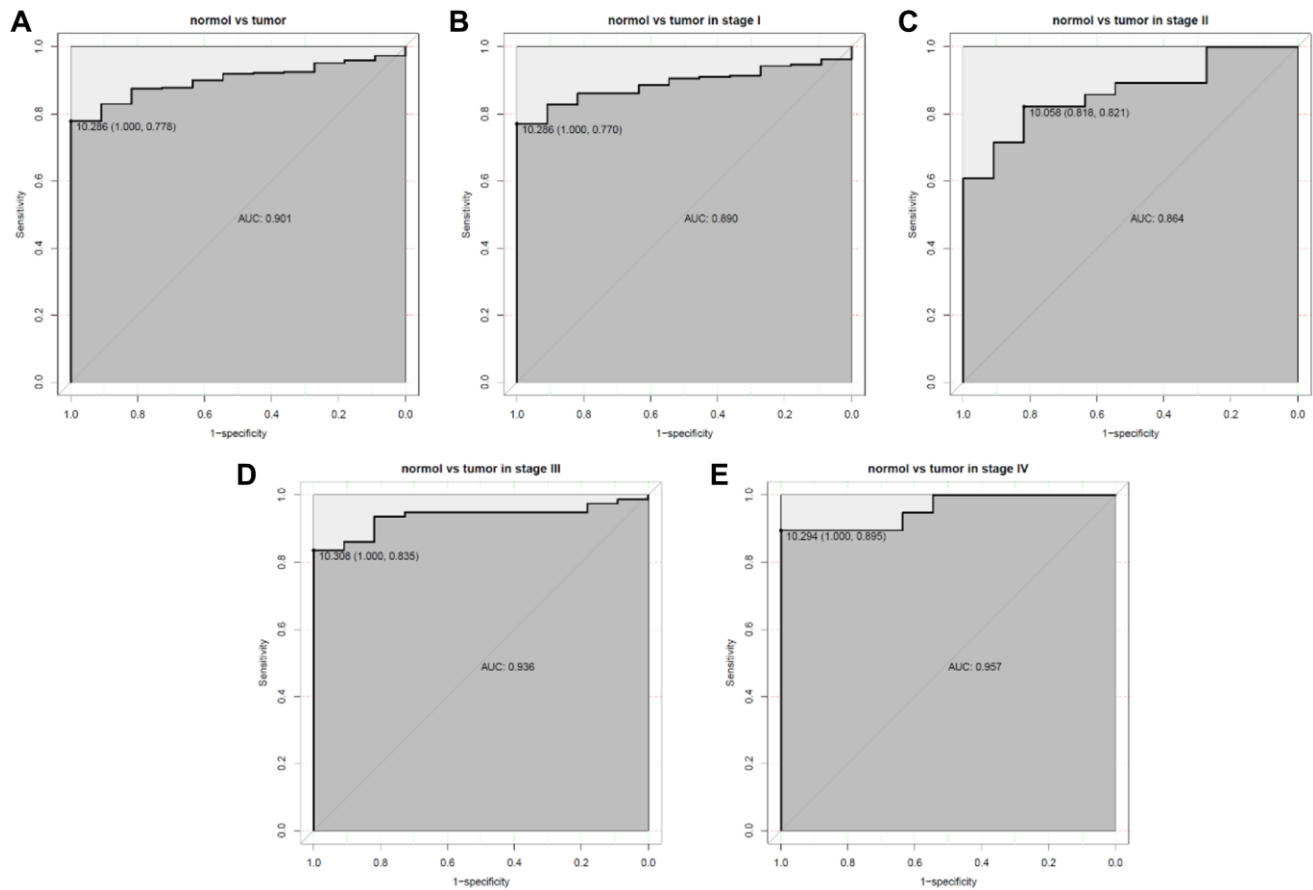

**Supplementary Figure 1. Diagnostic value of TARS expression.** ROC curve in (A) normal vs. tumor, (B) normal vs. tumor in stage I, (C) normal vs. tumor in stage II, (D) normal vs. tumor in stage III, and (E) normal vs. tumor in stage IV.
